# Supplementary material
Source: PubMed Central journal article supplement (PMC3421880)
Supplement: AAC.00112-12_zac999101155so1.pdf [file AAC.00112-12_zac999101155so1.pdf]

Figure 1A

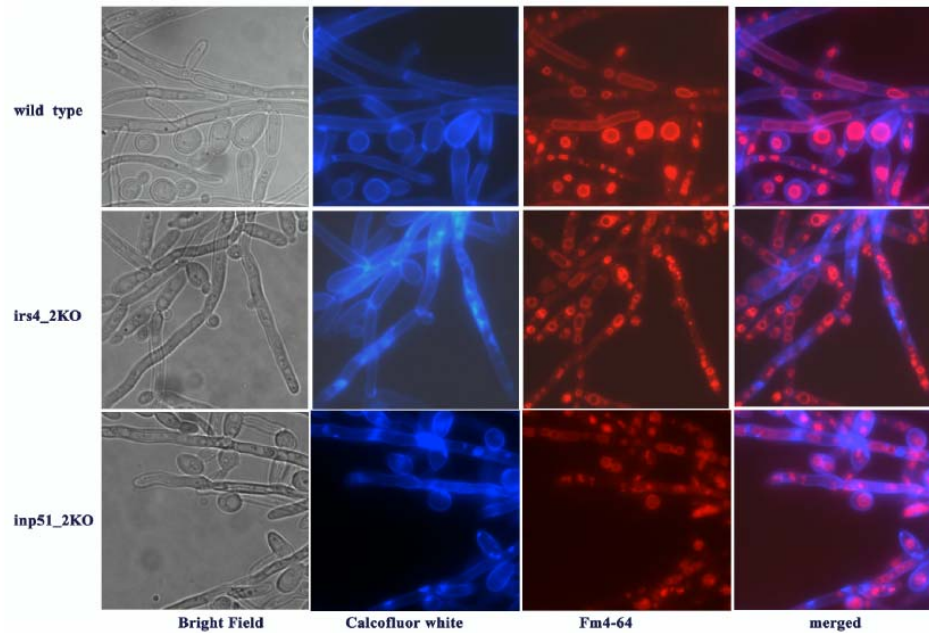

Figure 1B

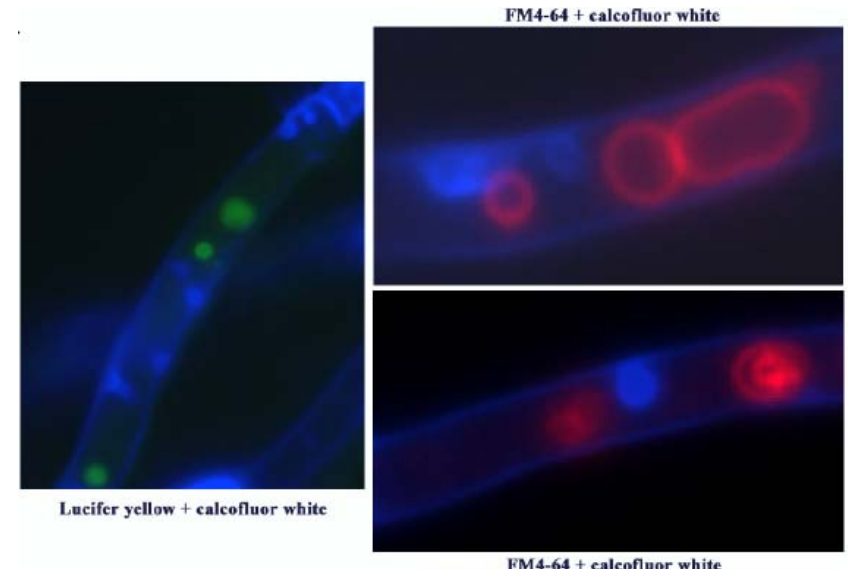

**Supplemental figure 1. The aberrant chitin-containing structures in *irs4* and *inp51* mutants are distinct from endocytic vesicles.** Wild-type, *irs4* and *inp51* cells grown were stained with calcofluor white to assess chitin distribution and FM4-64 or Lucifer yellow to assess endocytosis (Supplemental figure 1A). Calcofluor white localized to aberrant sites in mutant cells, but not wild-type cells. Staining with FM4-64 or Lucifer yellow revealed no differences in endocytosis between the mutant and wild-type strains. Overlay of images indicated a clear distinction between the calcofluor white-staining and FM4-64 or Lucifer yellow-staining structures. Higher resolution images mutant cells demonstrated clear distinction between chitin-containing structures (blue) and endocytic vesicles (FM4-64 staining is red; Lucifer yellow staining is green) (Supplemental figure 1B).

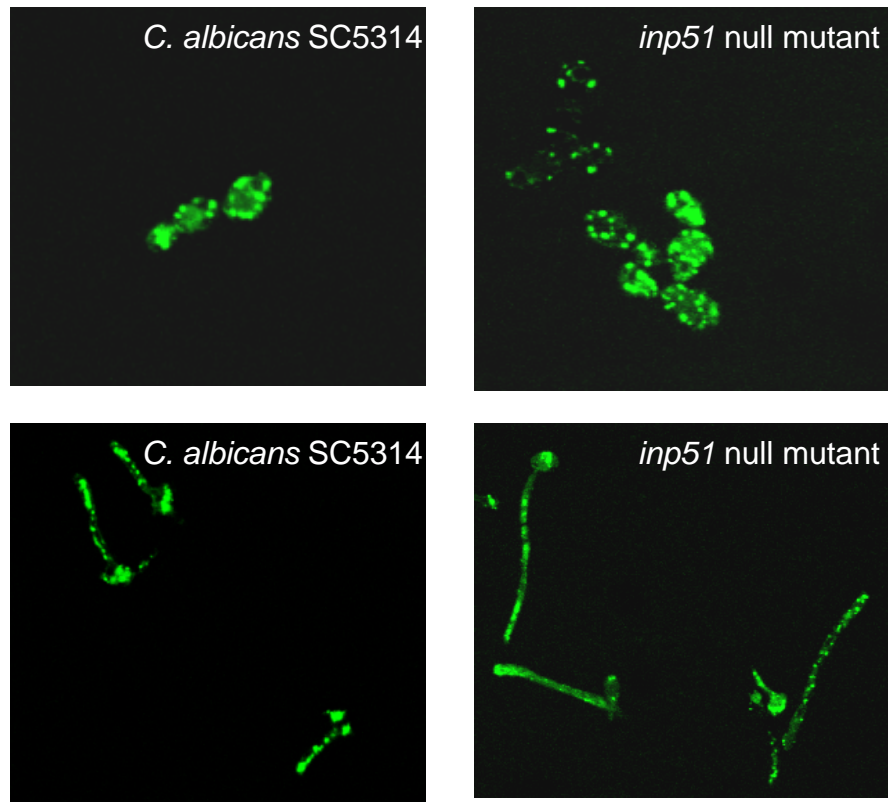

**Supplemental figure 2. Vrg4-GFP distribution is normal in *irs4* and *inp51* mutant cells.** Cells expressing a GFP-Vrg4 fusion were grown to induce hyphae at 37°C in YPD+5%FCS on the surface of glass-bottom culture dishes (MatTek, Ashland, MA) coated with Cell-Tak (BD Bioscience, Bedford, MA). All cells show normal Golgi structures. Cells were also fixed with 2% formaldehyde and stained with calcofluor white. The aberrant calcofluor white-staining structures in both *irs4* and *inp51* mutants do not co-localize with the GFP signal. Distribution of GFP-Arf1, GFP-Arf2, GFP-Rbt5 secretory signal and GFP-Sap1 secretory signal were also normal in mutant cells, and calcofluor white did not localize with GFP (images not shown).

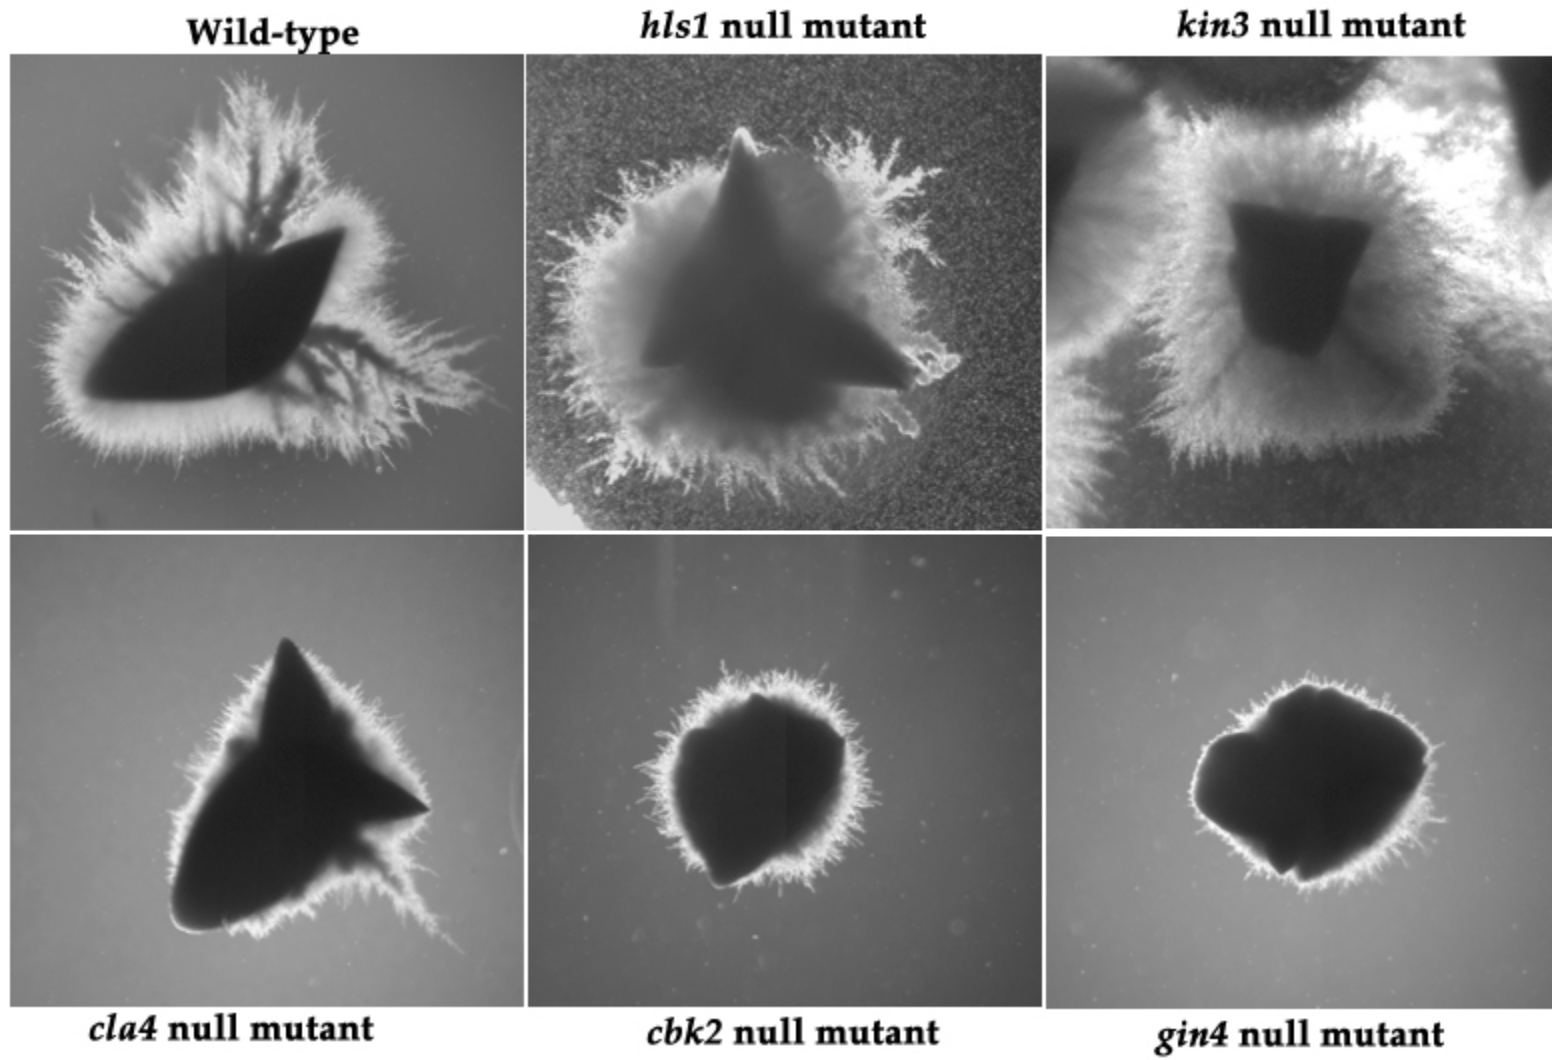

Supplemental figure 3a

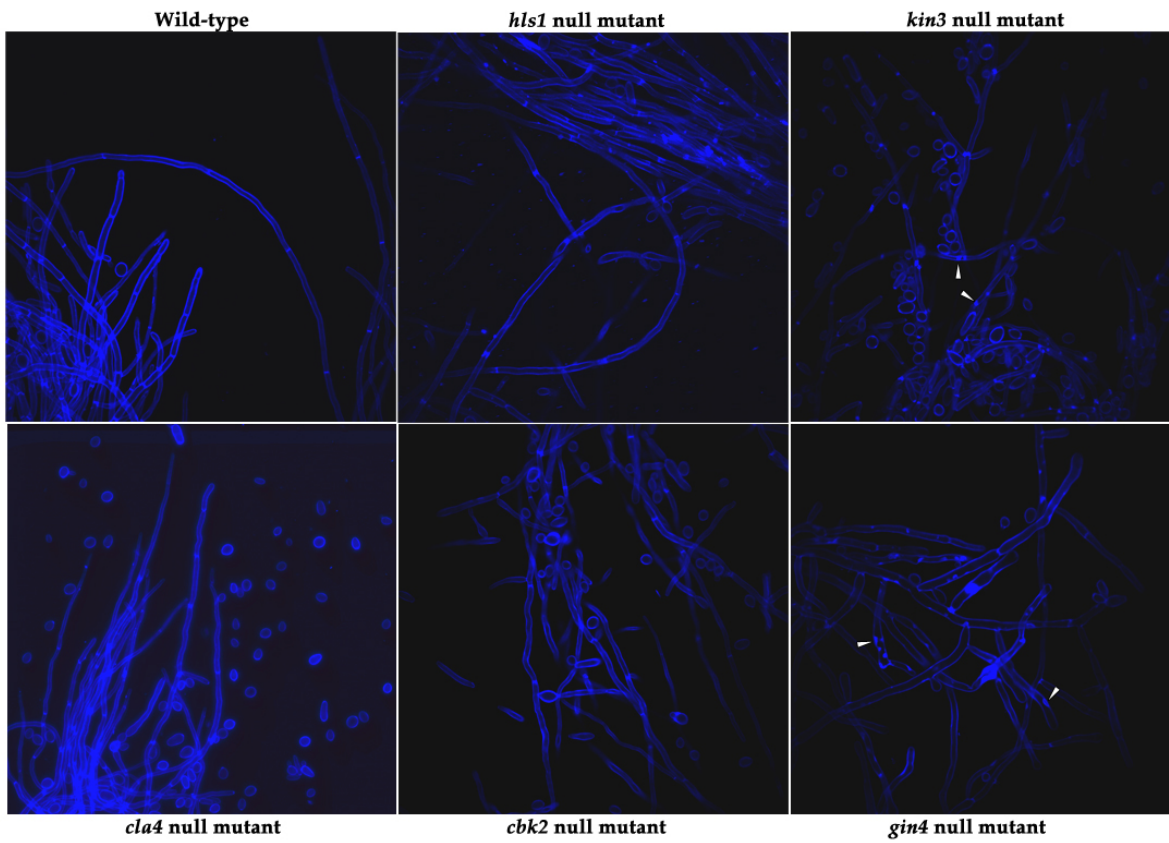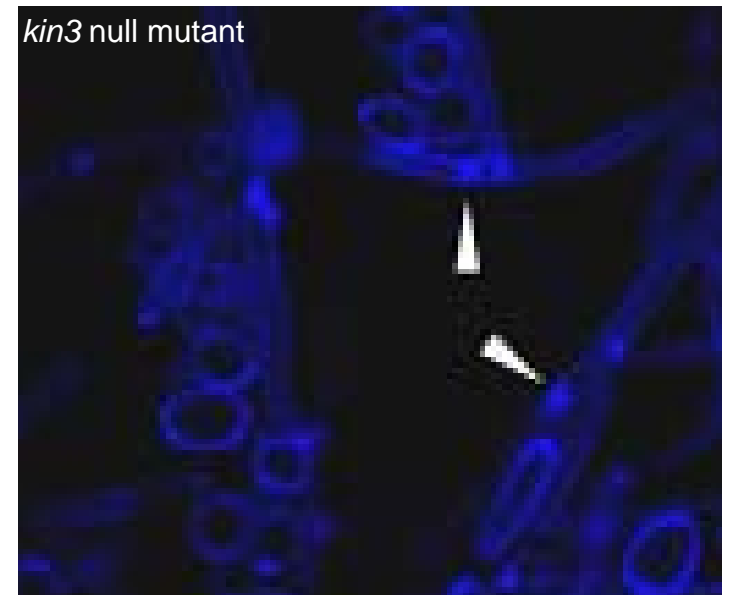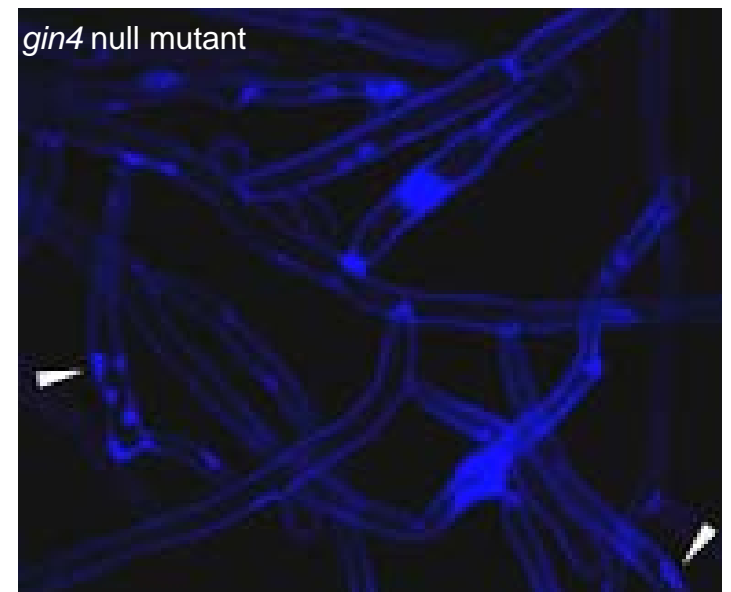

Supplemental figure 3b

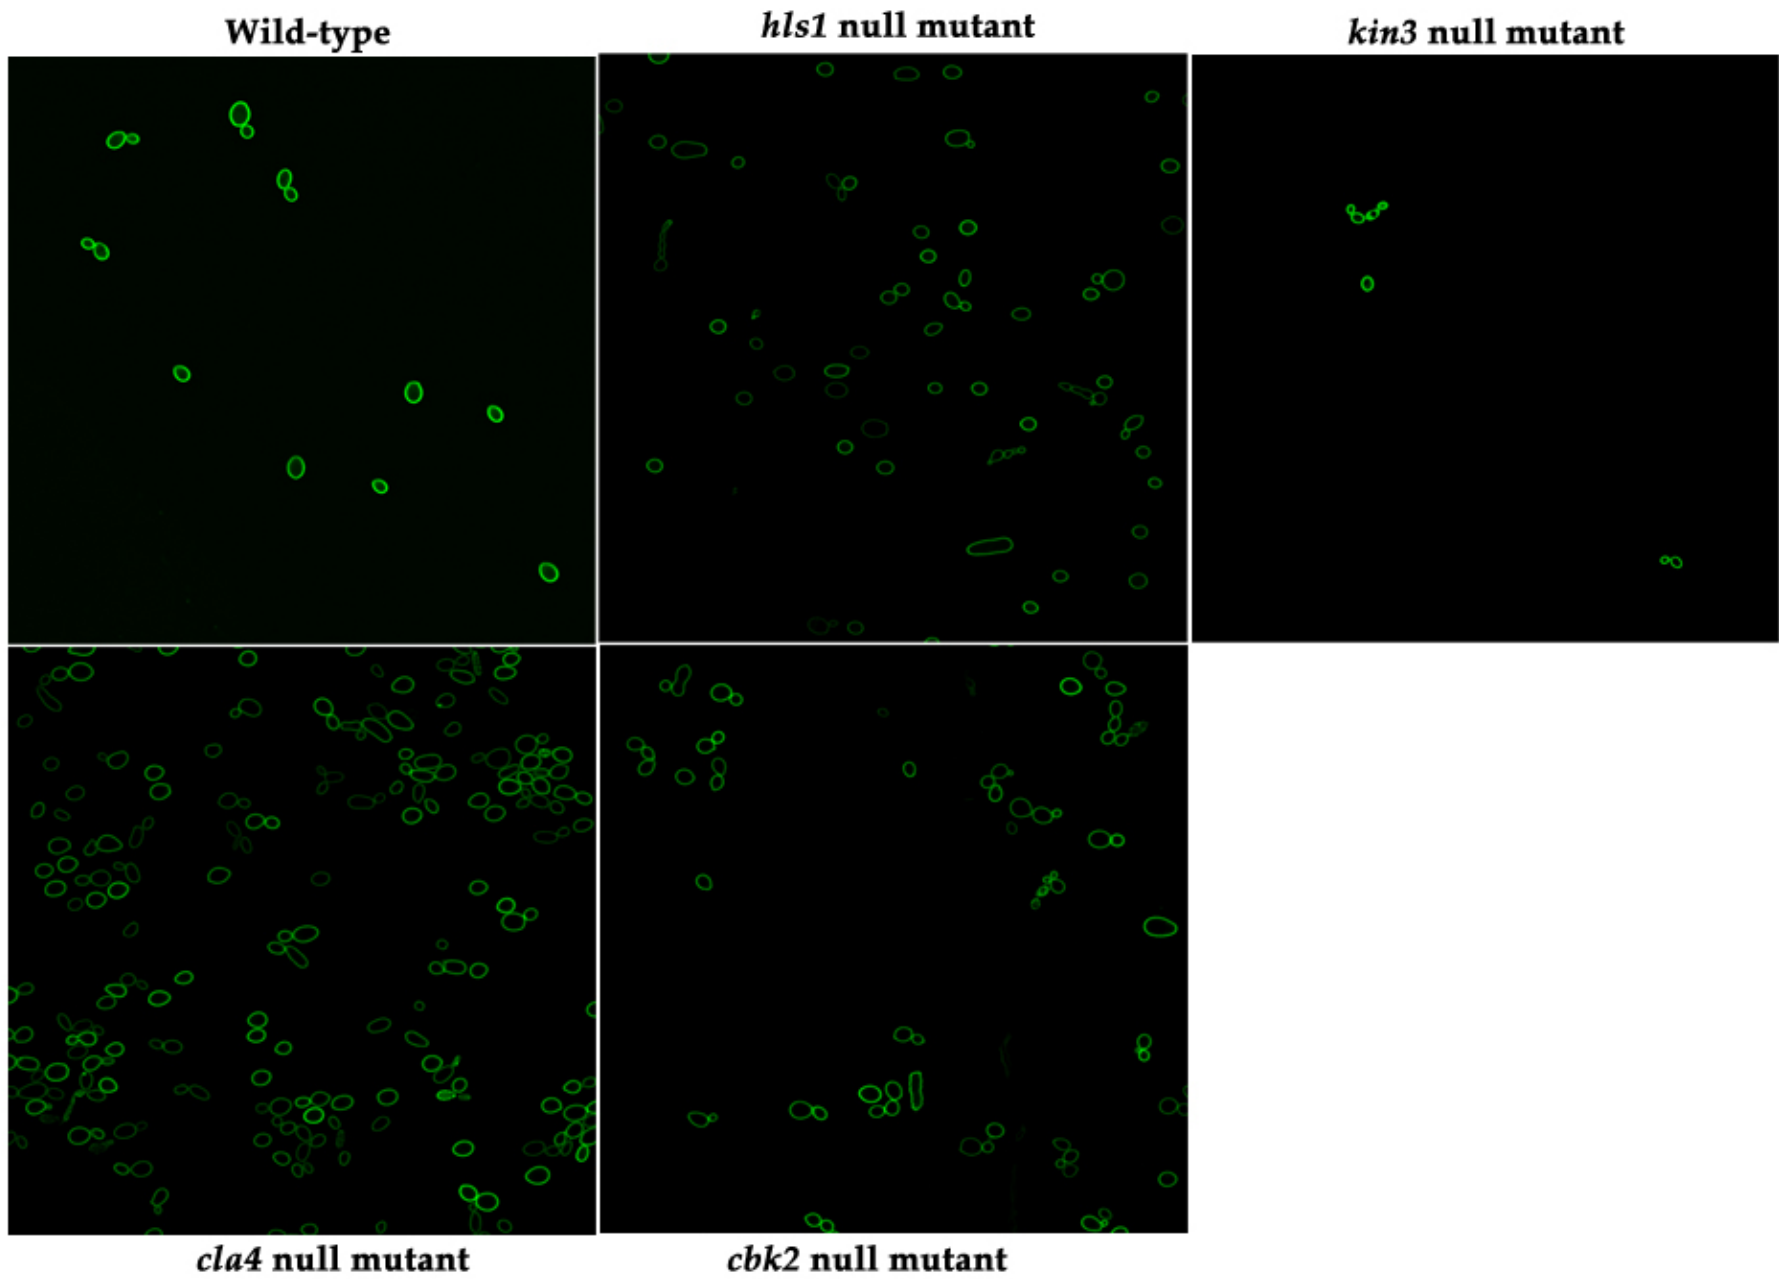

Supplemental figure 3c

**Supplemental figure 3. Phenotypes of the *gin4* mutant most closely resemble *irs4* and *inp51* mutants.** Invasive growth into agar (Supplemental figure 3A), calcofluor white localization (Supplemental figure 3B) and CaPH-GFP localization (Figure 3C) are shown for *hls1*, *kin3*, *cla4*, *ckb2* and *gin4* mutants. The phenotypes of mutants are summarized in Table 2. The *gin4* mutant resembled *irs4* and *inp51* in all phenotypes, consistent with the close relationship evident by gene expression profiling (see Figure 7). All phenotypes were identical for *gin4* mutants created in our original study, and in the present study using the SAT-flipper method. For all mutants, complementation of disrupted genes corrected aberrant phenotypes.
